# Supplementary material for: Eugenol Suppresses Platelet Activation and Mitigates Pulmonary Thromboembolism in Humans and Murine Models
Source: MDPI journal article supplement (doi:10.3390/ijms25042098), 2024-02-08
Supplement: s1 [file s1]

**A**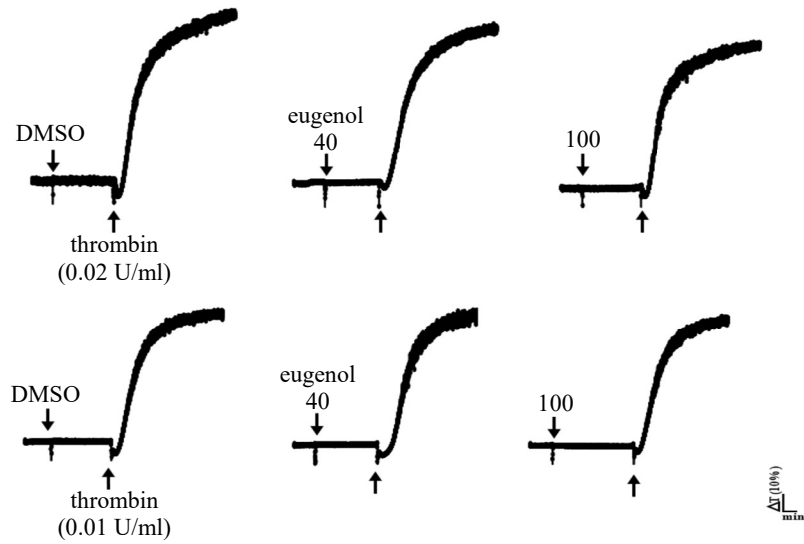**B**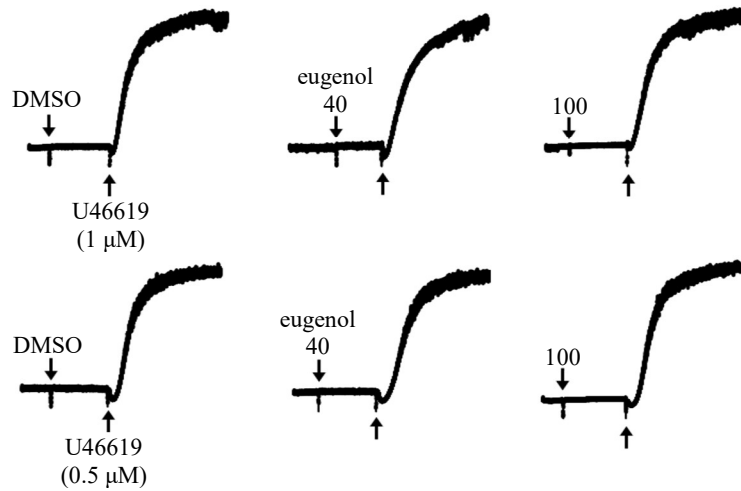

**Figure S1.** Washed human platelets ( $3.6 \times 10^8$  cells/mL) were preincubated with either a solvent control (0.1% DMSO) or concentrations of eugenol (40 or 100  $\mu\text{M}$ ). Subsequently, platelets were exposed to (A) thrombin (0.01 or 0.02 U/mL) and (B) U46619 (0.5 or 1  $\mu\text{M}$ ) to induce platelet aggregation. The concentration-response curves for eugenol emphasize its inhibitory effects on platelet aggregation induced by thrombin or U46619 (%). Profiles are representative of three similar experiments.

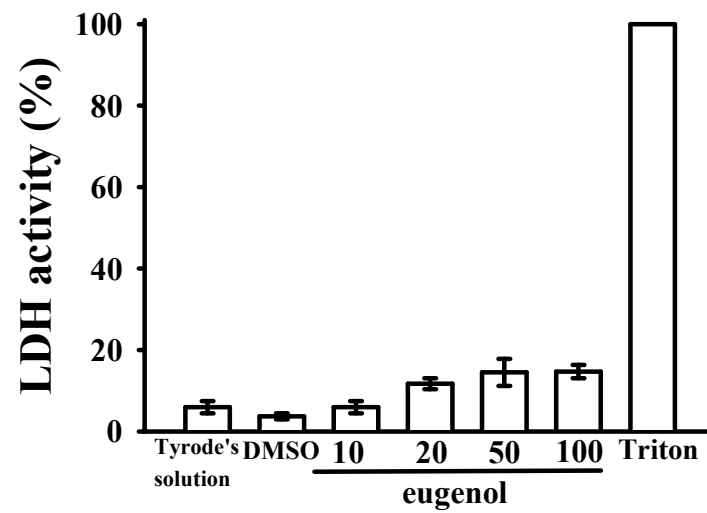

**Figure S2.** Effects of eugenol on platelet cytotoxicity. To assess the cytotoxicity, the solvent control (0.1% DMSO) or eugenol (10-100  $\mu$ M) were pretreated in platelets for 20 min, and a 10  $\mu$ L of the supernatant was dropped on a Fuji Dri-Chem slide LDH-PIII. Data are presented as the means  $\pm$  standard error of the mean ( $n = 3$ ).

**15 min**

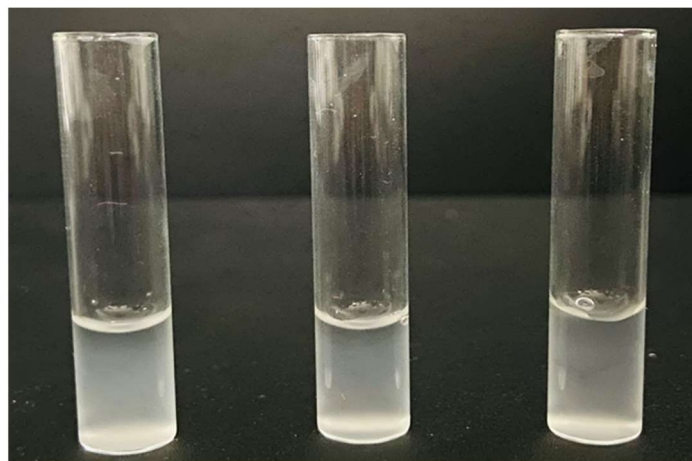

**30 min**

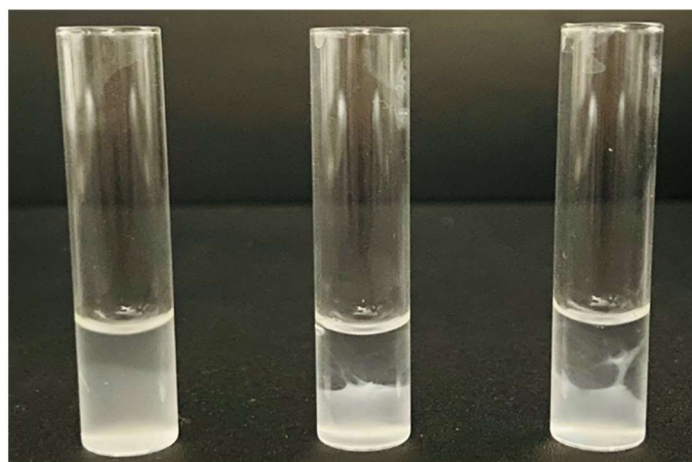

| eugenol    | Tyrodé's<br>solution | DMSO | 4 |
|------------|----------------------|------|---|
| fibrinogen | +                    | +    | + |
| thrombin   | -                    | +    | + |

**Figure S3.** Effects of eugenol on clot retraction. Washed platelets ( $3.6 \times 10^8$  cells/mL) were suspended in Tyrodé's solution containing 2 mg/mL of fibrinogen and 1 mM  $\text{CaCl}_2$  with 0.1 % DMSO or eugenol (4  $\mu\text{M}$ ). Clot retraction was initiated with thrombin (0.02 U/mL) at 37 °C. Images were photographed at 15- and 30-min intervals by using a digital camera. Profiles are representative of three similar experiments.
